# Supplementary material for: Lifestyle behaviors trend and their relationship with fear level of COVID-19: Cross-sectional study in Saudi Arabia
Source: PLoS One. 2021 Oct 13;16(10):e0257904. doi: 10.1371/journal.pone.0257904 (PMC8513859; doi:10.1371/journal.pone.0257904)
Supplement: S1 Data — (XLSX) [file pone.0257904.s001.xlsx]

## Sheet: Sheet1
record_id	Sex	Age	Marital Status	Educational Level	Region	Q10_work_status	number of chronic disease	Smoking Status	BMI	COVID-19 Fear Score	PA Level	SB (hr)	Number of Meals	Sleep Duration	PSQI Score	Total_Kessler_psychological_distress_scale	Total_mos
3	1	35	3	6	5	1	0	2	30.4076	14	2	2	3	7	7	19	92
4	2	35	3	5	1	2	0	2	42.6083	16	1	16	2
5	1	34	4	5	1	2	2	1	25.7812	18	3	3	1
6	1	45	3	5	1	2	1	2	31.2488	21	2	6	3	6	7
7	1	42	3	5	1	2	2	2	28.2284	28	1	5	2	8	5
8	2	33	3	6	5	2	0	2	33.0295	8	1	10	2
10	1	47	3	5	1	1	0	2	22.3133	13	2	3	2	5.5	8	11	76
13	1	31	4	5	1	3	0	2	22.3478	10	2
14	1	57	3	5	1	1	2	2	29.3848	17	1
15	1	33	1	5	1	2	0	2	31.8878	13	1	6	2
16	2	41	3	5	3	3	1	2	27.6361	24
18	1	23	1	5	1	1	0	2	0.001001	26	1	5	2	7	2
19	1	35	3	5	1	1	0	2	22.7615	10
22	1	30	3	6	3	2	0	2	26.0375	24	2	4	2	7	8	27	81
23	2	62	3	5	1	1	0	2	32.788	13	1	3	3	6	6	15	57
24	1	34	3	5	1	4	0	2	0.001001	21	1	15
25	1	32	3	6	1	2	1	2	25.7778	18	2	8	1
26	1	33	3	6	1	3	0	2	34.6268	21	1	16	1	12	6	10	53
27	1	27	1	5	1	3	0	2	28.6501	7	1	16	2
28	2	29	3	5	1	3	0	2	35.9085	18	1	4	2	6	4	45	75
29	1	41	3	5	1	2	0	2	32.4622	10	1	10	2	8	4	20	81
30	1	27	1	4	5	2	1	4	37.1058	10	2	5	3	8	2	27	39
31	1	40	3	4	5	1	0	2	20	12	1
32	1	43	3	5	1	1	1	2	25.0399	18	1	5	3
33	1	32	3	5	5	4	0	2	23.7954	14	2	16
34	1	39	3	5	1	1	1	2	25.1532	17	2	9	2	7	6
36	1	30	3	5	3	3	0	2	27.2173	12	1	3	1	6	5
37	1	21	3	5	5	3	0	2	0.001001	18	3	5	3	9	3	28	51
38	1	29	1	5	3	2	1	2	43.9446	10	2	12	3
39	1	33	3	5	5	1	0	2	24.7676	22	1	2
42	1	49	3	5	5	1	0	2	27.0552	19
43	1	30	3	5	5	1	0	2	23.7118	23
44	1	18	1	4	5	3	0	2	24.7676	9	1	10	3	5	11	21	84
45	1	40	3	6	1	2	0	2	28.3039	17	1	6	0	8	5
47	1	31	3	5	5	3	1	2	23.3091	16	1	1	2
48	1	33	1	5	5	1	0	2	28.9256	15	1	6	1	7	9	21	67
49	1	39	3	6	1	3	0	2	25.0762	11	2	5	2	8	5	10	88
50	1	40	3	4	1	1	1	2	27.0552	25	1	5	3	4	11
51	1	24	3	3	5	1	2	4	40.1555	25	3	6
52	1	34	3	6	4	3	0	2	24.7768	17	2	10	0	10	5	28	39
53	1	33	1	6	4	3	0	2	23.4952	18	1	9	3	6	5	13	65
54	1	36	3	6	1	2	0	2	20.5499	14	1	2	2	6	4	13	76
55	1	19	1	4	1	1	0	2	20.0692	20	3	3	1	7	4	20	95
56	1	25	3	5	1	1	0	2	22.0604	24	2	3	2	7	3	12	95
57	1	20	1	5	1	1	0	2	0.001001	18	1	8
58	1	20	1	5	1	3	0	2	26.6667	21
59	1	24	1	5	1	3	0	2	20.4467	20	1	8	2	7.5	5	31	66
60	1	20	1	4	1	3	0	2	23.4586	7	2	15	1	14	6	25	93
61	1	19	1	5	1	3	0	2	21.2585	13	1	10	2	8	2	10	43
62	1	19	1	5	1	1	0	5	24.6548	14	1	4	0	20	5	41	71
63	1	20	1	5	1	3	0	2	21.9899	24	2	3	1	8.5	3	21	36
64	1	19	1	5	1	1	0	5	0.001001	7	1	16	1	6	5	30	57
65	1	29	1	5	1	1	1	2	22.8928	13	1	2	3	9	2	27	28
66	1	20	1	5	1	1	0	1	20.5457	13	1	12	2	10	4	31	95
67	1	20	1	5	1	3	0	2	20.0692	19	2	12	1
68	1	24	1	5	1	3	0	2	21.6128	25	1	9	3	10	4	26	57
69	1	25	1	5	1	3	0	2	23.4375	12	2	10	3	9	4	14	91
71	1	24	1	5	1	3	0	2	38.7097	7	1	16	3
72	1	25	1	5	1	1	0	2	35.1562	19	3	12	3	10	3	41	52
73	1	23	3	5	1	3	1	2	23.3355	8	3	15	2
74	1	17	1	4	1	1	0	2	20.6852	14	1	10	3	8	4	27	64
76	1	19	1	4	1	3	0	2	18.3143	18
77	1	24	1	5	1	3	0	2	22.719	13	2	13	3	9	5	10	57
78	1	25	1	5	1	3	0	2	21.3578	10	2	5	2	8	3	20	88
79	1	25	1	5	1	3	0	2	15.4315	8	1	6
80	1	24	3	5	5	1	0	2	27.6888	20
81	1	24	3	5	1	1	0	2	25.3155	16	2	16	2	8	4
82	1	25	1	5	1	3	0	2	20.5761	16	3	5	1	8	2	10	19
83	1	24	1	5	1	1	0	2	30.111	24	2	8	2	8	7	38	67
84	1	22	1	5	1	3	0	2	28.9062	12
85	1	21	1	5	1	3	0	1	22.8928	13	2	14	1	8	4	19	37
86	1	25	1	5	1	3	0	2	0.001001	19	1	16	1	7	5	35	77
87	1	22	1	5	1	1	1	2	18.8271	12	3	5	1	10.5	5	15	95
88	1	25	3	5	1	3	0	2	19.0311	23	2	6	2	7	5	36	89
89	1	24	1	5	1	3	0	2	22.2656	15
91	1	20	1	5	1	3	1	5	23.5294	12	3	16	1	5	4	43	95
92	1	46	3	6	1	3	0	2	28.257	27	2	8	2	6.5	4	18	48
94	2	27	3	5	1	3	0	2	20.0288	9	1	15	3	9	4	21	43
95	1	24	1	5	1	3	0	2	20.6131	13
96	1	25	1	5	1	1	0	2	22.1893	13	1	8	3	8	5	12	95
97	1	24	3	5	1	3	0	2	24.6904	17	3	5	3	10	3	34	47
98	1	16	1	4	1	1	0	2	20.6852	20	2	16	1	7	4	37	73
99	1	25	1	5	1	3	0	2	0.001001	14	3	8	1	7	7
100	1	21	1	5	4	1	1	2	23.1377	17	2	5	1	9	3	17	86
101	1	41	3	5	4	1	0	2	0.001001	14
102	2	38	1	5	4	2	0	5	20.0288	24	2	6	0	20	7
103	1	30	3	5	2	3	0	2	23.1473	21	2	16	2	8	2	11	95
104	1	24	1	5	1	1	1	2	24.7768	15	2
105	1	31	1	6	2	3	0	2	29.9688	9	2	8
107	1	29	3	5	4	1	0	2	27.1111	9	2	3	2
108	1	45	3	4	4	1	0	2	0.001001	14
109	1	16	1	4	1	1	0	2	23.0469	22	2	2	2	12	2	28	74
110	1	21	1	5	1	3	0	2	19.4734	16	3	9	3	8	2	19	67
112	1	37	4	6	4	2	1	1	24.9781	19	3	4	2
114	1	22	1	5	1	3	0	2	0.001001	25	1	12	2	6	8	29	70
115	1	60	3	5	1	1	1	2	27.4077	18	1	1	3	8	1	13	63
117	1	20	1	5	1	3	0	2	16.6335	11
118	1	16	1	3	1	3	0	2	24.9108	15	2	7	2	10	8	14	41
119	1	20	1	5	1	3	0	2	21.5139	16	2	5	2	8	3	20	66
120	1	19	1	5	1	3	0	2	24.974	21	3	7	1	7	7	23	87
121	1	24	1	5	1	1	0	2	25	23	2	10	2	10	3	16	56
122	1	22	1	5	1	3	1	2	19.4771	11
123	1	26	1	5	1	3	0	2	20.4467	7	2	7
124	2	40	3	6	5	3	0	1	30.8642	16	2	8
125	1	23	3	4	1	4	0	2	21.7555	11	1	10	2	8	7	22	95
126	1	40	4	6	1	2	0	2	30.0433	9	3	10	2	10	5	11	79
128	1	27	1	6	1	4	0	2	23.0469	15	3	12	3	6	7	18	66
129	1	31	1	6	1	1	0	2	28.5375	15	3	2	2	8	3	17	76
132	1	25	1	5	4	1	0	2	18.591	9	1
133	1	30	3	6	4	2	0	2	27.1111	35	1	4
135	1	42	3	5	1	1	0	2	0.001001	15	1	6	3	6	3	16	38
136	1	24	1	5	1	2	0	2	0.001001	19	2	9	1	12.5	4	29	64
138	1	29	1	5	3	2	0	2	28.6851	9	2	6	3
139	1	30	3	5	1	1	0	2	22.0317	17
140	1	22	1	4	2	3	0	2	26.1719	11	1	6	2	9	5	25	90
141	1	29	1	5	1	3	1	2	20.2848	25	1	10	2	7	5	26	71
142	1	26	1	5	4	3	0	2	23.6244	15	2	5	2	9	1	28	90
143	1	23	1	5	1	3	0	2	23.7118	21	2	6
144	1	45	3	4	4	1	2	2	25.3906	16	1	0.5	2
145	1	41	3	5	4	1	0	2	0.001001	11	1	0.5
146	2	32	3	6	4	2	0	2	20.7612	12	2	3	3	7	9	13	94
147	1	22	1	4	2	3	0	2	26.1719	11	1	8	2	10	9	16	92
148	1	30	1	5	1	3	0	2	25.7812	22	1	7	2	7	7	39	38
149	1	21	1	5	1	3	0	2	24.5578	15	1	16
151	1	36	1	5	4	4	2	2	48.6993	20
152	1	23	1	5	1	3	0	2	21.8724	12	2	6	1	8	4	12	69
153	2	22	1	5	1	3	0	2	22.921	12	2	10	2	9	4
154	1	26	1	5	4	2	0	1	27.6817	25
156	1	24	1	5	1	3	0	2	16.7311	16	1	6	2
157	1	24	1	5	1	3	0	2	16.7311	15	1	6	2	5.5	9	42	75
158	1	37	3	5	1	2	0	1	21.2183	16	1	15
159	1	37	3	5	4	1	0	2	19.5312	14
160	2	35	3	5	1	3	2	2	26.8745	12	2	3	3	7	6	18	89
161	1	48	3	6	4	3	2	1	23.8754	19	2	1	2	6	6	40	26
162	1	40	3	5	1	1	0	2	33.6949	26	2
163	1	41	3	5	1	4	1	2	27.4145	29
164	1	32	3	4	5	1	0	2	27.3437	24
166	1	30	1	5	1	1	1	1	23.8751	12	1
167	1	25	1	5	2	2	0	2	21.5045	11	2	5
168	1	37	3	5	4	1	1	2	22.0386	12	1	12	3	7	3	14	93
169	2	39	3	4	4	1	0	2	44.8164	33	2	12	2	5	7	46	28
170	1	40	3	5	1	4	0	2	18.2899	13	1	5	3	10	4	12	76
171	1	37	3	5	1	1	0	2	0.001001	13	2	8
172	2	30	1	6	2	3	0	2	19.1571	25	2	7	2	9	6	43	36
173	1	39	3	4	1	1	1	2	27.3797	13	1	4	2	7	5
176	1	37	3	5	1	1	0	1	24.2187	19	1	2	1
177	1	35	3	5	1	4	0	2	33.2031	23	1	16	2	7	7
179	1	38	3	4	4	2	1	1	30.0914	29	2	4	2	5	7	26	72
181	1	47	3	4	1	4	0	2	31.6337	15	2	6
182	1	37	3	5	4	1	0	2	8.01602e-05	18	1	2	3	6	3
183	1	49	3	5	1	3	1	2	0	22	2	16	1	8	8	14	52
184	1	40	3	5	2	3	0	2	31.6158	19	1	16	3	8	3	13	95
185	1	27	3	5	1	1	0	2	26.4381	13
186	1	37	1	6	1	3	0	2	30.8463	16	3	2	3	8	7
187	1	30	3	5	1	1	0	2	0.001001	15
189	1	39	3	5	1	3	1	2	20.7612	24	2	4	0	8	6
192	1	32	1	4	1	1	0	2	21.2306	10	2	16	1	10.5	0	40	79
193	2	38	4	6	1	3	0	2	26.493	25	1	10	3	8	6	31	28
194	2	38	3	5	1	2	1	1	26.2346	18	2	2
197	1	58	3	4	1	1	1	2	38.0499	18	2	8	3
199	1	38	3	4	4	1	0	2	28	17
200	1	39	4	5	1	3	1	1	29.5858	7	1	3	3	7	3	20	88
201	1	35	3	5	5	1	0	2	31.25	14	1	1
202	1	43	3	5	4	3	0	1	22.9421	17
203	1	18	1	4	4	1	0	2	31.25	12
205	1	28	3	5	3	3	0	2	23.4952	26
206	1	24	1	5	1	2	0	2	17.313	9	2	4
207	2	28	1	5	1	2	0	1	34.7178	9	1	16
208	1	33	3	6	4	3	0	2	25.7812	22	2	8	2	8	4	26	38
209	1	36	3	6	1	3	0	2	25.1039	13	1	2	3	9	3	21	78
210	1	54	4	5	1	2	1	2	26.8352	14	1	5
211	1	47	3	4	1	1	0	2	27.6304	12
212	1	38	3	5	1	1	0	1	24.6904	21	2	2	2	4	14	43	58
213	1	39	3	6	1	2	0	2	31.6263	11	1	16	2	7	10	10	82
214	1	47	3	5	1	4	1	2	30.1194	14	1	10	0	6	4	36	71
215	1	50	3	5	1	1	1	2	32.0291	15	2	2	2	6	5	16	68
216	1	47	3	6	1	2	0	2	29.7211	11	2	7	3	7	4	14	67
217	1	25	3	6	1	1	0	2	31.1419	15
218	2	19	1	4	5	3	0	2	17.7557	11
219	1	40	3	5	4	1	0	2	35.3798	10	1	5
220	1	15	1	3	1	3	0	2	0.001001	17	1	4	2	10	4	26	59
221	2	31	1	5	1	3	0	4	22.8571	12	1	8	2	6	13	20	90
222	2	37	3	4	1	4	0	2	35.8564	15	2	3	1	8	7	11	79
223	1	36	3	6	1	2	0	2	37.1094	12	2	10	3	10	4	21	90
224	1	25	1	6	1	3	0	4	24.7721	16	2	6	2	12	9	35	29
225	2	71	3	6	1	4	0	2	25.0135	20	1	5	2	6	3
226	1	26	3	6	1	1	0	2	35.3386	13
228	1	28	3	5	1	3	1	1	19.3625	17	2	4	2	7	6	13	95
229	1	33	3	5	3	1	0	2	28.0689	11	1	5	2	8	9	10	38
231	1	32	1	6	1	2	0	1	23.3355	18	2	4	2	8	6	21	59
234	1	22	1	5	1	3	0	2	27.3437	14	2	6	3	9	3	11	75
235	1	22	1	5	1	4	0	2	26.6728	14	3	12	2	10	5	18	59
236	1	21	1	5	1	3	0	2	0.001001	16
237	2	42	3	5	1	2	0	2	35.8915	14	2	8
238	1	22	1	5	1	1	0	2	22.8624	8
239	1	22	1	5	1	1	0	2	21.3599	14	1	16	3	11	4	34	60
240	1	27	4	4	1	1	0	2	16.6335	11	2	10	2	10	2	24	78
241	1	22	1	5	1	3	0	2	23.1247	10	2	6	3	6.5	4	30	64
243	1	50	3	4	1	1	0	2	29.7056	11
244	1	21	1	5	1	3	1	2	19.0677	16	1	5	1	9	3	33	47
245	1	40	3	5	1	1	1	2	28.0277	12	2	2
246	1	22	1	5	1	4	0	2	21.0772	14
247	1	42	3	5	3	4	0	2	30.4498	16	2	4	2	8	7	24	77
248	2	50	3	6	1	2	1	2	32.8466	20
249	1	21	1	4	1	1	0	2	18.591	8	2	4	2	5	5	14	69
250	2	24	1	5	1	3	0	2	20.9366	18	1	10	2	7	4	26	41
252	1	25	3	5	1	1	0	2	0.001001	26
253	1	40	3	5	3	4	0	2	24.4444	13	1	6	3	8	10	12	45
254	1	22	4	5	1	3	0	2	25.9701	7
255	1	20	1	5	1	3	0	2	23.7332	17	1	12	1	10	6	20	64
256	1	34	3	5	5	2	0	2	21.3944	13	2	9	2	6.5	6	19	76
257	1	23	1	5	1	1	0	2	30.0433	19	1	16	2	6.5	11	29	39
259	2	22	1	5	1	3	0	2	24.4898	15	3	8	3
260	2	71	3	6	1	1	0	2	25.0135	15	1	5	2	5.5	4	11	87
261	2	24	1	5	5	3	0	1	29.8158	7
262	1	52	3	5	1	4	0	1	28.0404	18	3	8	2	6	4	22	37
263	1	22	3	5	1	3	1	2	21.6441	16	3	4	2	8	7	26	89
264	1	43	3	4	2	1	1	2	27.0993	16	2	7	2
265	1	22	1	5	1	3	0	2	23.8054	17
266	1	22	1	5	1	3	0	2	41.6504	14	2	6	2	6	8	24	68
267	1	27	1	5	1	1	0	2	25.6312	10	1	6	1	10	5
268	1	24	1	5	1	3	0	1	35.5999	8	1	16	2	8	6	24	78
270	1	37	3	5	1	3	1	2	29.5159	28	3	1	2	8	10	33	68
271	1	22	1	5	1	3	0	2	35.0862	16	1	16	2	10	4	25	33
272	1	36	3	4	5	1	0	2	23.8054	17
273	1	47	3	5	1	3	0	2	27.1203	24	1	12	1	7	4	19	70
275	1	18	1	5	1	3	0	2	17.6254	20
276	2	28	1	5	1	2	0	1	22.571	16	1	10
277	1	45	3	5	5	4	2	2	25.3906	24	3	2	1	9	7	27	92
278	1	19	1	5	1	3	1	2	25.9701	12	1
279	1	21	1	5	5	3	0	1	15.4266	14	3	10	2	10	4	21	87
280	1	32	3	5	5	1	1	2	20.9366	11	2	3	0	5	10
281	1	30	1	6	1	2	1	2	28.3039	7		10	3	6	9
284	2	43	3	5	1	2	0	1	30.5241	11	3	3	3	4	7	31	69
285	1	44	3	5	2	4	1	2	21.4844	13	2	4	0	8	5	36	22
286	1	28	1	5	5	3	0	2	22.6562	21	1	16
287	1	39	3	5	5	2	2	2	22.4323	18	3	16
288	1	48	3	5	1	3	0	2	29.9688	13	1	10
289	1	39	3	6	1	3	0	2	23.6128	15	2	4	2	7	7	16	57
290	2	33	3	6	1	3	0	4	24.4473	13	1	12	3	8	5	11	70
291	1	35	3	5	1	3	1	2	27.0051	30	2	3
292	1	38	3	6	4	1	0	2	26.7229	25	2	7	3	8	7	25	66
293	2	41	3	5	1	3	2	2	35.9963	13	1	6	1	10	2	10	38
294	2	43	3	5	5	4	0	1	30.4218	14	1	16
295	1	35	3	5	1	4	1	2	32.4675	23	3	4	2	7	4	16	36
296	1	35	3	4	1	1	0	2	27.1816	20	2	3	3	9	1	22	72
298	1	34	3	5	4	1	1	2	21.7738	14	2	2	3	7	10
300	1	23	1	5	5	3	0	2	17.0874	21	1	16
301	1	18	1	5	1	1	0	2	18.0662	7	1	7	2	6	5	28	74
303	2	23	1	5	1	3	0	2	32.6531	12	2	2	2
304	1	59	3	4	1	1	4	2	32.4444	20	1	12	2	9	7
305	1	35	3	5	1	1	0	2	21.7555	25	1	7	3
306	2	24	1	4	1	2	0	2	19.257	14	3	10	3	10	7	25	25
307	1	54	3	5	5	3	0	2	33.284	12	1	16	3	7	4	26	87
308	1	35	3	6	1	3	0	2	29.2101	9	1	7	1	8	2	12	95
309	1	40	1	6	1	3	0	2	0.001001	10	1	1	3	6	5	14	47
310	2	65	3	6	5	1	1	2	22.5827	7	2	2	3	7	5	10	84
311	1	31	3	5	1	1	1	2	24.539	21
312	2	38	3	6	1	4	0	2	0.001001	20	2	5
313	2	40	3	6	1	3	0	2	24.974	7	1	8	1	8	4	10	19
316	1	36	3	5	1	3	0	2	21.5451	16	1
317	1	50	1	6	1	3	0	2	24.6548	13	2	6	3	7	6
318	1	42	3	5	5	3	0	2	37.5776	12	1	7
319	1	20	1	4	1	3	0	2	18.0662	12
320	1	46	3	5	1	1	0	2	34.5473	13	1	9	2	7	4	11	91
321	2	69	3	6	1	1	2	4	22.3435	23	2	4	2	6.5	8	14	77
323	1	27	3	5	5	2	0	2	20.5457	18	1	6
324	1	34	1	6	1	1	0	2	18.8707	7	1
325	1	24	1	6	1	1	0	2	28.0404	7	1	16
327	1	24	3	5	5	3	0	2	29.6158	29	1	16
328	2	58	3	5	1	1	3	1	0	24	1	14	3	8	6	11	76
329	1	36	3	5	3	1	0	2	23.4952	17	3	5	3	8	6	34	95
330	2	31	1	6	1	3	0	2	36.2897	16	1	8	0	5	5	27	50
331	1	20	1	5	1	3	0	2	0.001001	20	2	16	2	6	8
332	2	41	3	4	1	1	0	2	43.75	10	2	16
334	2	48	3	5	1	4	3	2	26.4463	14
335	1	22	1	5	1	1	0	2	29.2421	23	2	5	2	9	5	43	50
337	2	40	3	6	1	2	0	2	28.3266	21	2	10	2	6	5
338	1	30	1	5	4	1	0	2	17.313	11	1	12	2	8	2	10	95
339	1	34	1	5	4	2	1	1	34.8087	15	1	8
340	2	33	1	5	1	1	0	1	28.3937	13	1	16	2	8	4	14	63
341	2	60	3	6	1	3	2	2	35.7513	19	2	12	3	8	5	10	90
343	1	26	3	5	4	1	0	2	26.9531	23	1	16	3	8	6	20	39
344	1	24	1	5	2	1	0	2	28.764	9	1
345	1	27	1	5	4	1	1	2	37.8772	23	1	10	2	10	4	25	84
346	1	55	2	5	5	3	4	2	44.9532	7	2	12	3	10	5	10	95
347	1	26	1	5	4	4	0	2	32.2708	14	3	3	2	6	5	31	73
349	1	25	3	5	1	1	0	2	22.8928	15	1	16	1	9	4	13	63
351	2	68	3	6	1	4	6	2	32.9507	14
352	1	26	3	5	4	1	0	2	28.5156	16	1	16	3	7	4	13	41
353	1	25	1	5	4	1	0	1	33.0904	18	1	10
354	1	35	3	6	4	3	0	2	35.1541	20	2	2	3	7	3	18	57
355	1	33	3	6	4	4	0	2	24.974	15	1	5	1	5	9	23	57
356	1	40	3	5	1	1	1	2	28.0277	12	1	2	3	6	3
357	1	40	3	5	1	1	1	2	28.0277	8	1	2	3	6	4
358	1	26	3	5	4	1	0	2	27.2932	21	2	5	2	7	3	19	90
359	1	17	1	4	1	1	0	2	0	17
360	1	24	1	5	5	1	0	2	26.1249	20	1	16	1	6	3	27	33
361	1	24	1	5	1	1	1	2	24.5578	9
362	1	43	3	4	2	1	1	2	26.7698	13	2	7	2	7	4	34	52
363	2	35	3	6	3	3	0	2	24.093	14	1	7	2	8	3
364	1	30	4	4	5	4	0	2	31.25	8	2
366	1	40	1	6	1	3	5	2	41.6493	16	2	16	3	4	9	21	66
368	1	34	1	6	5	3	0	2	38.6196	18
369	1	27	1	5	4	3	1	2	0.001001	11	1	6
370	1	40	1	6	5	3	0	2	23.4375	16	2	10	2	7	9
371	2	48	3	6	1	3	0	2	29.7609	12	2	4	0	8	5	10	59
373	1	20	1	5	1	3	0	4	23.833	12	2	6
374	1	50	3	5	1	4	1	2	29.1749	9	1	2	3	5	6	10	95
375	1	28	3	5	1	1	1	2	21.7784	8	2	7	1
376	2	50	3	5	1	1	2	4	27.4529	16
377	2	58	3	5	4	1	1	2	31.1419	10	1	6
379	1	42	3	4	1	1	1	2	31.9922	34	2	4	3
380	2	70	3	5	1	1	4	1	41.1387	7	1	16	3	5	5	21	89
381	1	50	4	5	4	3	1	1	23.3091	12	1	4	1	6	7	15	60
383	1	33	3	6	1	3	0	2	24.5603	27	2	8	2	7	4	34	74
384	1	35	3	6	1	3	0	2	22.0317	16
385	2	32	3	6	1	3	0	2	22.0195	10
386	2	49	3	6	1	3	0	2	27.3437	13	1	6	2	5	11	21	52
387	1	26	1	5	1	3	1	2	22.6562	14	2	16	2	5	6	21	47
389	1	32	3	5	4	1	1	2	30.7787	15
390	1	35	3	6	1	2	0	2	27.3437	13	1	3
391	2	33	3	6	1	3	0	1	32.1929	11	1	8	3	7	4	20	71
393	1	36	3	5	1	3	0	2	22.1003	13	2	5	3	10	9	11	94
394	1	29	1	5	1	4	0	2	31.8275	21
395	1	52	3	5	4	3	0	2	22.8545	15	2	6	2	8	4	23	78
396	1	26	3	5	1	3	0	2	22.6562	14	1	8	2	7	2	19	84
397	2	45	3	5	1	3	0	2	23.6652	13	1	4	1	6	5	13	48
398	1	53	3	5	4	4	0	2	5.71142e-05	20	1	9	1
399	1	33	3	6	4	3	0	2	27.3437	7	2	1	1	7	3	36	47
400	1	29	3	6	1	2	0	2	28.5156	22	2	5	2	7	4	26	88
401	1	30	3	6	1	3	0	2	25.7812	13	1	5	2	9	4	17	92
403	1	22	1	5	1	3	0	2	21.7555	24
404	2	54	1	5	1	1	1	1	27.3437	15	2	10	2	8	9	26	66
405	1	34	3	6	1	3	0	1	28.9811	27	1	10	2
406	1	33	3	5	1	4	0	2	31.6242	22	2	1	1	6	4	22	37
407	1	28	1	5	1	4	0	2	20.9644	11	2	9	3	8	5	10	82
408	2	37	3	5	1	3	1	2	24.2424	16	2	7
410	1	35	3	5	1	3	0	2	26.1752	20
411	1	33	3	6	1	3	0	5	24.677	22	2	8
412	1	32	3	5	1	4	0	2	28.125	14	2	4	2	9	3	13	52
413	1	48	3	5	1	3	0	2	25.3906	12	2	3
416	2	33	3	5	1	3	0	2	20.7157	16	1	13	3	6	9	16	57
417	1	63	4	6	4	3	4	2	7.31462e-05	7	1	8
418	1	33	3	5	1	4	1	2	26.8136	31	3	3	3	8.5	4
419	1	50	1	6	4	3	0	2	32.4219	17	2	14	3	6	2	10	81
420	1	30	3	5	1	3	1	2	23.8367	18	2	3	2	7	5	34	34
421	1	25	3	5	1	2	1	2	28.2284	21	2	5	3	8.5	5	30	86
422	1	33	3	6	1	3	0	2	23.3067	16
423	1	61	3	6	4	2	2	2	32.4619	10	1	4	2	6	10	14	87
424	1	29	1	5	1	2	1	2	29.1363	25	2	4	2	7	10	24	69
425	1	30	1	6	1	3	0	2	0.001001	18	1	10	1	12	6	10	38
426	1	28	1	5	1	2	0	2	21.5451	33
427	1	36	3	6	1	3	0	2	23.0518	15	2	5	2	7	11	12	76
428	1	39	3	6	1	3	1	2	24.0882	14	2	6	1	7	4	17	46
429	1	39	3	5	1	1	0	2	30.116	18
430	1	38	1	6	4	3	0	2	32.4622	21	1	16	3
432	1	45	3	5	1	4	0	2	32.8892	22	1	12	2	6	10	21	46
433	1	55	3	6	4	4	1	2	29.4118	17	3	10	2	5	4	16	95
434	1	38	3	5	1	1	0	2	27.1918	19	1	3.5	2	8	3	18	66
436	1	35	3	5	1	4	0	2	25.6055	19	1	3	3
437	1	29	3	5	1	1	0	2	31.6443	16	1	15	2	8	5	12	59
438	1	34	1	6	4	3	1	4	25.2595	16	2	7	1	6	2	15	89
439	1	30	3	6	1	1	0	2	42.5781	13
441	1	27	3	5	1	1	0	2	16.4062	17
442	1	19	1	5	1	3	0	2	17.898	12	2		2
443	2	39	3	5	5	3	2	1	39.2465	25	1	10	3	8	3	16	79
445	2	59	4	6	4	2	4	2	34.5758	17	2	5	2	4	8	30	76
446	1	25	1	5	4	2	0	2	31.1111	18
447	1	28	1	5	5	3	0	2	22.6562	21	1	16	1	6	8	27	31
449	1	41	3	5	1	3	0	2	23.1247	21	2	10	1	7	2	14	84
450	1	29	1	6	1	2	0	2	20.3125	10	2	2.5	3	7	5	11	68
451	1	29	1	6	1	3	1	2	25.8065	21	2	8	2	7	5	27	60
454	1	23	1	5	1	3	0	2	20.4491	21	1	12	2	4.5	4
458	1	29	1	6	1	2	0	2	18.1955	14	1	16	3	8	8	19	58
461	1	40	3	5	1	4	0	2	0.001001	14	2
462	1	35	3	5	1	1	0	2	17.8506	14	1	16	1	7	4	19	75
463	1	25	1	5	4	3	0	2	22.151	15
464	1	26	3	5	1	1	0	2	18.8707	13	2	3	1	10	3	18	78
465	1	25	1	5	4	3	0	2	21.875	13	2	4	2	5	7	12	95
467	1	42	3	5	1	3	1	2	27.3437	23	2	5	2	8	3	18	95
468	1	35	3	5	4	1	1	2	21.3039	14
469	1	33	1	5	1	1	0	2	0.001001	25
471	1	26	3	5	1	3	0	2	19.433	13
472	1	50	3	5	1	1	4	2	29.1363	18	1	1	2
473	2	39	3	5	2	2	0	3	29.0533	20
474	1	40	2	5	1	3	2	1	30.0781	23	1	12	2	12	5	50	76
475	1	53	3	5	1	3	0	2	26.8544	14	2	10
476	2	48	3	6	1	3	0	2	26.6749	12	2	12	3	8	2	17	88
477	1	38	3	5	2	1	0	2	17.9931	18	2	5	2	10	5	10	87
478	1	33	3	6	1	3	0	2	23.03	20	1	12
479	1	32	4	5	1	3	0	2	27.9421	11	2	7	1	10	3
480	1	30	3	6	1	3	0	2	0.001001	19
481	1	37	1	5	1	3	0	2	25.3902	14	2	4	1	6	11	19	38
482	1	53	3	5	1	3	0	2	26.8544	12	2	10	0
483	1	28	3	5	1	2	0	2	26.8136	18	1	6	1
484	1	50	3	4	4	1	1	2	34.9277	9	1	14	1	7	8	18	95
485	1	45	3	5	1	1	2	2	28.3447	20	1	12	1	8	3	19	95
486	1	42	1	6	1	3	0	2	27.0993	24	1	10	3	7	6	35	76
487	1	39	3	6	2	2	0	2	28.7274	12	1	2
488	1	37	3	5	2	1	0	2	33.0904	21	2
489	1	39	3	5	2	2	0	1	23.9188	11	1	5	1	6	1	25	63
490	2	33	3	5	2	2	0	1	26.8687	10
491	1	45	3	6	1	3	0	2	31.6443	19	2	3	2	9	5	17	44
496	1	22	1	5	1	4	0	2	32.4557	15	2	6
497	2	42	3	5	2	2	0	2	28.3937	10	1	5	3	6	6
498	2	29	3	5	1	2	0	1	41.6451	16
499	1	30	1	6	1	2	0	2	25.4767	10
500	1	37	1	6	1	1	0	2	35.5999	15	2	8	3	6	5	30	77
502	1	38	3	5	1	3	0	2	27.3437	20	2	12	2	6	7
503	2	25	1	5	1	3	0	1	30.5556	18	2	6	0	5	7	30	95
504	2	29	1	5	1	2	1	1	22.4082	15
506	1	34	3	4	3	4	0	2	0.001001	17
507	1	39	4	6	1	4	1	2	29.1363	12	1	16
508	1	31	3	6	1	3	0	2	28.7201	15	2	5	2	9	9	16	48
509	1	38	3	5	1	4	0	2	25.5296	26	2	3	2	8	8	22	52
510	1	40	4	5	1	3	0	2	31.1111	31	2	3	3
511	1	38	3	6	1	4	1	2	27.5482	8	1	5
512	1	50	3	5	1	4	0	2	33.2986	17
513	1	28	1	5	1	2	0	2	23.5294	19	2	5	3	7	5
517	1	56	3	4	4	1	0	2	33.2031	21
519	1	31	3	6	4	1	0	2	24.2215	19	2	3	3	6	6	20	95
520	1	26	1	5	1	2	1	1	19.7055	27	1	8	2
521	2	34	3	6	4	3	1	2	24.3438	19	2	11	3	6	8	14	84
526	1	51	3	5	4	1	1	2	25.9107	19	2	4	1	8	5	20	54
527	1	60	3	5	4	1	3	2	27.6817	28
528	1	25	3	5	1	2	0	2	28.0404	12	1	3	3
529	1	55	4	6	1	1	3	2	29.7442	9	1	16	1	6	5	27	40
530	1	63	3	4	4	1	1	1	29.3575	12	3	6	2	4	11	17	60
531	1	50	1	6	4	3	0	2	31.1419	14	2	12	1	4	8	28	65
533	1	60	3	5	4	1	2	2	27.6817	22	3	1	1
535	2	50	3	5	2	1	0	1	27.7778	13	2	5	2	10	6	17	76
537	1	40	1	5	1	3	0	2	24.0346	20	1	6	2	5	4	25	73
538	1	18	1	5	4	1	1	2	53.3333	22
539	1	34	3	5	2	2	0	2	26.3702	22	1	3	2	8	5	11	95
542	1	50	3	5	5	4	3	2	37.7778	33	1	6	1
543	2	33	3	4	2	2	0	1	37.1823	16	1	10
544	1	40	1	5	1	3	0	2	22.5981	18	1	6	2	7	6	28	67
545	1	30	3	5	1	1	0	5	27.3437	12	1	2	0	7	2	30	57
546	1	33	1	6	1	3	0	2	24.1672	23	1	6	2	11	4	17	19
547	1	27	1	5	1	2	0	2	21.4844	8
548	1	28	1	4	1	1	0	2	28.764	20	2	1	1	9	3	26	21
549	2	46	3	5	1	2	1	2	29.0318	18	1	4	2	6	6	16	69
550	2	53	3	3	1	2	0	2	25.5593	14
551	1	41	3	6	1	3	1	2	26.5643	11	1	10	2	10	3	24	85
554	1	33	1	6	1	3	0	2	23.1473	24
556	2	38	3	5	1	2	0	2	28.9979	24	2	4	0	8	8	19	58
557	1	41	3	5	1	1	0	2	27.1918	26	1	5	1	9	7	18	34
559	1	42	3	5	1	4	1	2	32.0759	15
560	2	64	3	5	1	4	0	2	26.6436	12	2	10	3	6	7	13	61
561	1	35	3	6	1	3	0	2	28.3987	13	2	10	2	6	4	13	73
562	2	42	3	5	1	3	1	1	32.872	14	1	8	2	5.5	9	11	70
563	1	21	1	5	4	3	0	2	28.959	16	2	12	1	10	3	34	61
564	1	58	3	4	1	1	0	2	30.8444	11	1	6	2	6	2
565	2	43	4	5	4	2	1	2	35.4172	11	2	7	1	7.5	4	12	29
566	2	17	1	4	1	1	0	1	24.9108	11			0
567	2	58	3	5	2	1	0	2	28.3447	12	2	10
570	1	22	1	5	1	4	0	2	32.4557	16	2	6	2	7	2	18	39
571	1	34	3	6	1	3	0	2	21.5139	19	1	2
572	1	55	3	4	1	1	2	2	32.0461	14	2	5	0	6	7	36	65
574	2	32	3	5	1	1	0	1	25.1808	9
575	1	52	4	5	4	4	0	1	26.0375	30	2	4	2	7	5	16	76
576	1	49	3	4	1	1	1	2	32.3884	18	2	6
578	1	32	3	6	1	3	0	2	24.9108	13	2	5	2	7	5
579	2	30	1	5	4	4	1	1	23.8367	15	2	6	3	8	5	30	43
580	1	45	3	5	1	4	0	2	24.6094	21	2	8	2
581	2	47	3	5	1	2	1	2	25.7959	29	2	9	2	8	8	11	76
582	1	53	3	5	1	1	1	2	31.6443	27	3	16	2
585	1	48	3	4	2	2	2	2	51.2623	14	2	8	3	6	8
586	2	27	1	4	1	1	0	2	28.0899	13	2	10	1	8	4	15	88
589	1	27	3	5	1	4	0	2	22.5466	21
590	2	50	3	5	4	3	1	2	30.4053	15	2	16	2	8	4	12	79
592	1	50	3	3	1	1	2	2	38.1039	17	2
598	1	25	1	5	4	3	0	2	20.7031	17	1	5
599	1	27	1	5	4	4	0	2	0.001001	22	2	4
602	1	30	3	5	4	1	0	2	28.3039	17	1	8	2
603	1	28	1	6	1	2	0	2	27.993	13	1	16	3
604	1	62	3	5	1	1	2	2	28.3447	11	1	6
605	1	28	3	6	5	2	0	2	27.2392	13	2	5	3	8	8	30	54
606	1	50	3	5	1	3	3	2	28	23	1	16	2	7	6
607	1	42	3	6	1	3	0	2	28.2284	16	1	16
608	1	55	3	4	2	1	1	2	33.3108	31	1	1
610	1	42	3	6	4	2	2	2	31.2295	20	1	9	2	6	5	17	50
611	1	26	1	6	2	2	0	2	34.6667	14	2	15	3
612	1	37	3	5	5	1	1	2	26.0375	29
613	1	33	4	6	1	3	0	2	23.1247	20	1	5
615	2	40	3	6	1	2	1	2	21.2585	17	1	8.5
617	1	60	2	5	1	1	0	2	30.6122	21	1	4
618	2	47	3	5	1	2	1	1	25.9516	15
619	1	50	4	5	1	1	1	2	31.25	15	3	7
620	1	34	1	5	5	1	0	2	25.3906	14	2	3	1	8	6	23	83
621	2	52	3	5	1	1	1	2	28.4005	16
622	1	29	3	5	1	3	0	2	21.3578	7	2	10	2	10	3	33	87
623	1	92	3	5	5	1	0	2	22.3757	18	1	2
624	1	28	3	6	2	2	0	2	28.7619	13	2	4	3	4	9	12	51
625	1	20	1	5	1	3	0	2	24.974	10	2	1.5	3	7.5	1
626	1	50	3	5	1	1	1	2	33.0579	14	2	5	1	8	4	18	47
627	1	65	3	4	1	1	3	2	32.831	21	2	4	2	7	5
630	1	54	3	4	4	1	1	5	34.626	27	1	5	2	7	5	27	56
632	2	38	1	5	3	1	0	2	27.3356	19	3	4	2	4	7	16	31
635	1	32	1	5	2	2	0	2	27.5312	10	1	4
637	2	30	3	5	4	3	0	2	22.7833	12	1	16	2
638	2	50	3	5	1	4	0	1	27.7634	19	2	9	2	7	6	11	94
639	1	51	3	5	1	1	1	5	25.1429	16	1	1	0	7	6	18	55
641	1	34	1	5	4	2	1	2	22.5466	18	1	16	2	12	3	23	40
642	2	20	1	5	2	1	0	2	25.7959	14	1	12	3	7	4	12	95
643	1	25	3	5	4	2	0	2	0.001001	15	2	8	1
644	2	38	3	6	4	3	1	3	29.7609	18	1	4	1	5	8	28	73
645	2	18	1	4	4	3	0	1	34.7489	14
647	1	29	1	6	1	3	0	2	26.6389	18
648	1	20	1	5	5	1	1	1	20.3428	10	2	12	2	4	9	28	66
649	1	24	1	5	1	2	0	2	26.1752	27
650	1	23	1	5	4	1	0	2	23.7253	16	2	6	2
651	2	64	3	5	2	1	3	5	29.3848	13	1	12	1
652	1	33	3	5	2	2	0	5	27.2932	25	3	5	3	9	4	32	46
653	1	35	3	4	2	2	0	2	25.2994	10	2	4	2	8	4	14	66
654	1	31	3	5	2	3	0	2	24.3418	16	1	7	0	7	9	26	73
657	1	36	3	5	2	2	0	2	22.2656	14
658	1	30	3	5	2	1	1	2	31.245	15	1	3	1	6	9	11	95
660	1	55	3	6	1	3	0	2	28.6501	16	2	4	1
662	1	38	3	6	2	1	0	2	25.9516	16	2	2	1	2	4	18	34
663	1	36	3	5	2	1	0	2	39.1598	12	2	6	2	9	5	20	38
666	1	25	1	5	2	2	0	2	21.5045	9	2	6.5	2	5	10	21	70
667	1	49	3	5	1	1	0	2	27.3437	9	2	12	2	8	3	12	66
668	1	23	1	4	1	3	0	2	22.4996	11	1	12	2	7	5	22	78
669	1	23	1	5	1	3	0	2	31.1419	18	2	4
670	1	22	1	5	1	3	2	2	44.6163	14	1	16	2	9	3	47	30
671	1	22	1	5	1	1	1	2	23.4375	12
672	1	23	1	5	1	1	0	2	26.1752	11
675	1	21	1	5	1	3	0	2	28.251	21
676	2	28	1	6	3	3	2	2	36.1682	7	2	16
680	1	25	1	5	1	1	0	2	17.5781	18	3	7	3	1	8	25	74
681	1	25	1	6	1	3	1	2	29.4118	13
683	1	33	3	5	1	1	0	2	24.7768	28	2	4	2	9	3	27	76
684	1	18	1	4	4	1	0	2	26.0375	16
685	1	24	1	5	4	2	0	2	23.5556	15	1	6	2	9	4	15	79
686	1	46	3	5	1	1	0	2	38.1042	18	2	16	3	8	4	37	37
687	1	34	3	5	4	1	0	2	7.71542e-05	18	1	6	1	7.5	6	18	83
688	1	30	1	5	4	1	1	2	24.0346	14
689	1	23	1	5	1	1	0	2	21.7555	14	2	11	3
690	1	25	1	5	1	2	0	2	19.2901	19	2	5	2	6.5	4	20	58
691	2	23	1	5	1	3	0	2	0.001001	13	1	16
692	2	57	3	5	3	3	2	2	7.31462e-05	20
693	1	50	3	6	1	3	0	2	25.7117	14	2	3	3	5	8	12	38
695	1	20	1	6	1	3	3	2	33.0579	12	2	5	2	8	8
696	1	26	3	5	4	1	1	2	24.9199	24	3	1	3
698	1	22	1	5	2	3	0	2	23.2335	15	1	12	3	5	4	11	82
700	1	63	3	6	4	4	1	2	39.8961	33	2	2	3	8	7	16	95
701	1	26	1	5	4	2	2	2	22.7694	23	1	10	2
703	1	25	3	5	4	1	0	2	29.5159	19
705	1	26	1	5	1	1	0	2	31.2488	10	2	5	2	10	4	31	46
708	1	25	1	5	1	1	0	2	26.6389	17	1	9	0	1	10	10	92
709	1	24	1	5	4	2	0	2	20.4444	10	2	16	3	6	6	10	57
711	1	24	1	5	2	3	2	2	24.4561	18	2	10	2	11	2	34	65
